# Supplementary material for: Elucidation of the function of oxygen moieties on graphene oxide and reduced graphene oxide in the nucleation and growth of silver nanoparticles
Source: Royal Society of Chemistry journal article supplement (doi:10.1039/c6ra10483e), 2016-01-01
Supplement: c6ra10483e1.pdf [file c6ra10483e1.pdf]

Table 2. The intensity (peaks areas in arb. units) of carbon, oxygen and silver as well as the oxygen/carbon and silver/carbon ratios.

| Sample     | Intensity [a.u.] |      | $I_{\text{O}}/I_{\text{C}}$<br>[%] | Intensity<br>[a.u.] | $I_{\text{Ag}}/I_{\text{C}}$<br>[%] |
|------------|------------------|------|------------------------------------|---------------------|-------------------------------------|
|            | C                | O    |                                    |                     |                                     |
| GO         | 1354             | 1076 | 79                                 | -                   | -                                   |
| PRGO       | 1628             | 828  | 51                                 | -                   | -                                   |
| RGO        | 2045             | 723  | 35                                 | -                   | -                                   |
| GO-AgNPs   | 653              | 375  | 57                                 | 112                 | 17.2                                |
| PRGO-AgNPs | 1436             | 598  | 42                                 | 31                  | 2.2                                 |
| RGO-AgNPs  | 1869             | 505  | 27                                 | 18                  | 1.0                                 |
